# Supplementary material
Source: ML conference proceedings conference paper supplement (https://openreview.net/forum?id=xLPakPOKDX)
Supplement: supplementary_material [file attachment]

# CAUSALLY MOTIVATED DIFFUSION SAMPLING FRAMEWORKS FOR HARNESSING CONTEXTUAL BIAS

Anonymous authors

Paper under double-blind review

## Baseline 1: prompt engineering

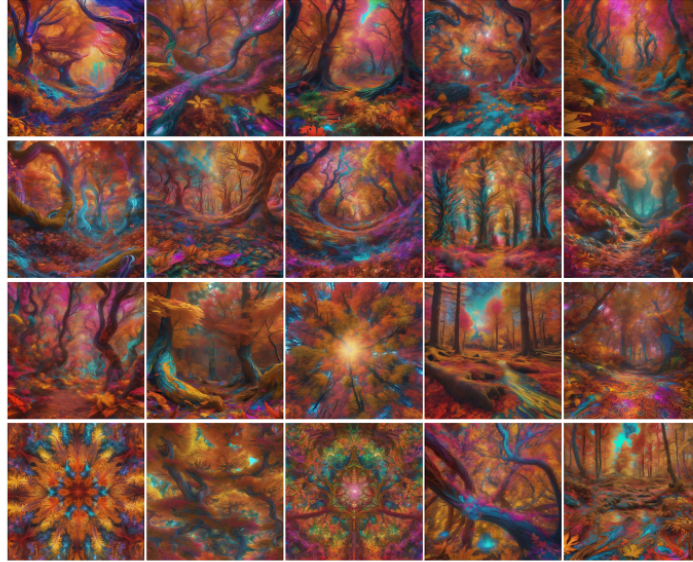

“Autumn forest landscape, psychedelic style”

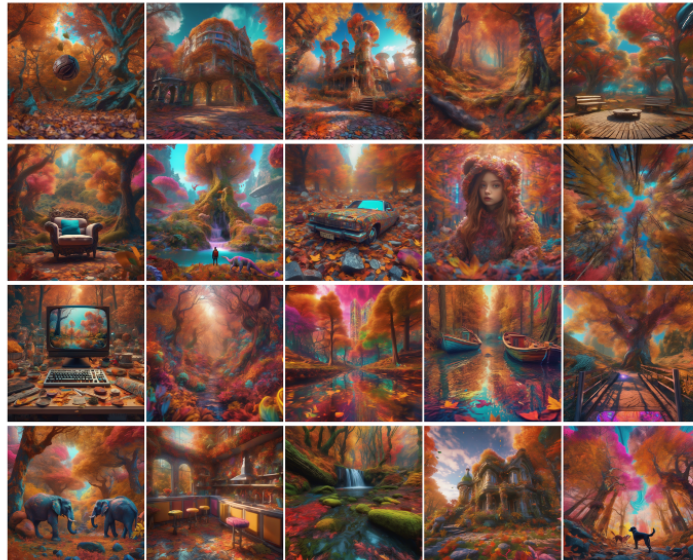

Ours

Figure 1: Additional baseline comparisons. Here, we randomly sample 20 samples per prompt and per setting and show all of them without cherry picking. The Baseline 1 is implemented by a simple prompt engineering. The query to Gemini is f“briefly modify the given prompt to be creative. Answer in one sentence.: ‘{prompt}’ “. The engineered prompt is used as a text input.

054  
055  
056  
057  
058  
059  
060  
061  
062  
063  
064  
065  
066  
067  
068  
069  
070  
071  
072  
073  
074  
075  
076  
077  
078  
079  
080  
081  
082  
083  
084  
085  
086  
087  
088  
089  
090  
091  
092  
093  
094  
095  
096  
097  
098  
099  
100  
101  
102  
103  
104  
105  
106  
107

### Baseline 2: prompt engineering + negative prompt

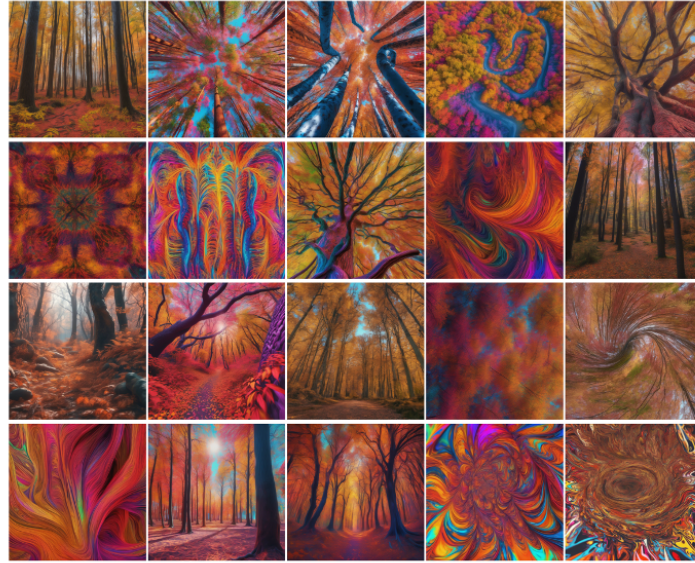

“Autumn forest landscape, psychedelic style”

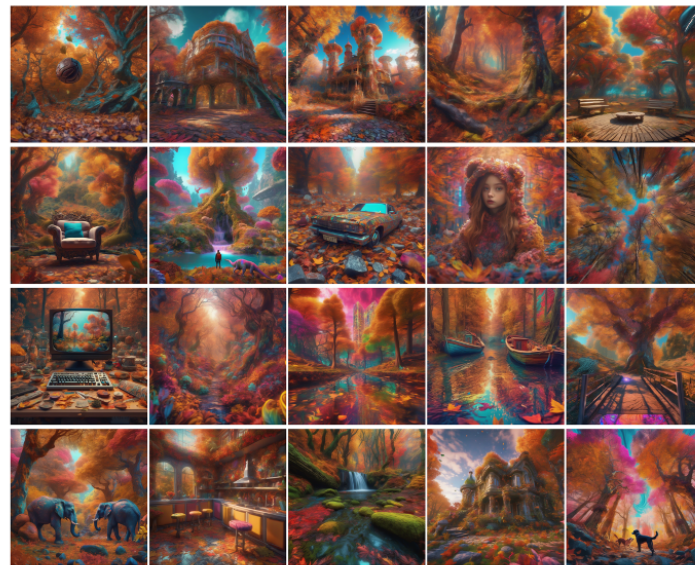

Ours

Figure 2: Additional baseline comparisons. Here, we randomly sample 20 samples per prompt and per setting and show all of them without cherry picking. The Baseline 2 is implemented by prompt engineering and negative prompt techniques. The query to Gemini is f“What would be the frequently co-occurring objects that can be likely placed in the scene generated by the given prompt ‘{prompt}’? Do not answer the words mentioned in the prompt. Answer 10 objects except for {important\_obj} one line with comma.”, where important\_obj is manually predefined as key object from the prompt. (e.g., “ancient dragon” from “A fantasy illustration of ancient dragon”.) The answer is used as a negative prompt during the sampling process.

108  
109  
110  
111  
112  
113  
114  
115  
116  
117  
118  
119  
120  
121  
122  
123  
124  
125  
126  
127  
128  
129  
130  
131  
132  
133  
134  
135  
136  
137  
138  
139  
140  
141  
142  
143  
144  
145  
146  
147  
148  
149  
150  
151  
152  
153  
154  
155  
156  
157  
158  
159  
160  
161

### Baseline 1: prompt engineering

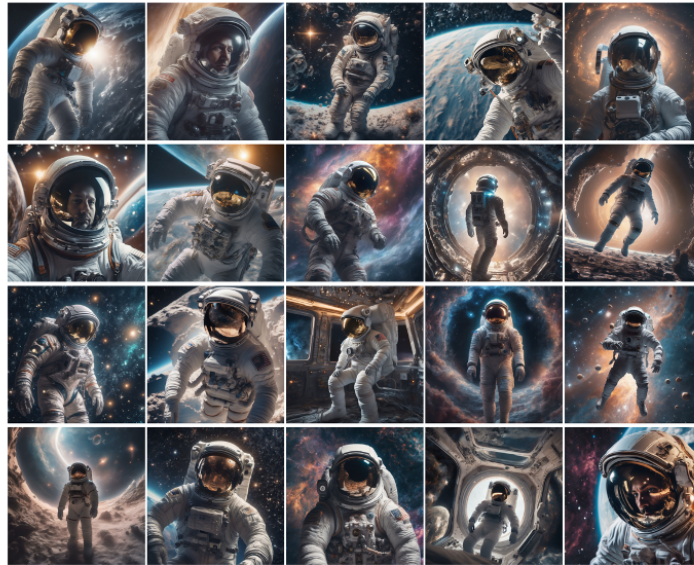

“photo of an astronaut”

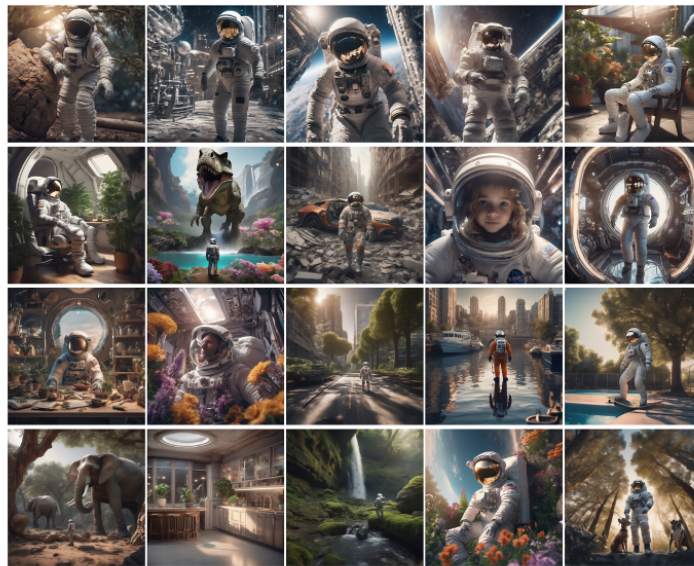

Ours

Figure 3: Additional baseline comparisons. Here, we randomly sample 20 samples per prompt and per setting and show all of them without cherry picking. The Baseline 1 is implemented by a simple prompt engineering. The query to Gemini is f“briefly modify the given prompt to be creative. Answer in one sentence.: ‘{prompt}’ “. The engineered prompt is used as a text input.

162  
 163  
 164  
 165  
 166  
 167  
 168  
 169  
 170  
 171  
 172  
 173  
 174  
 175  
 176  
 177  
 178  
 179  
 180  
 181  
 182  
 183  
 184  
 185  
 186  
 187  
 188  
 189  
 190  
 191  
 192  
 193  
 194  
 195  
 196  
 197  
 198  
 199  
 200  
 201  
 202  
 203  
 204  
 205  
 206  
 207  
 208  
 209  
 210  
 211  
 212  
 213  
 214  
 215

### Baseline 2: prompt engineering + negative prompt

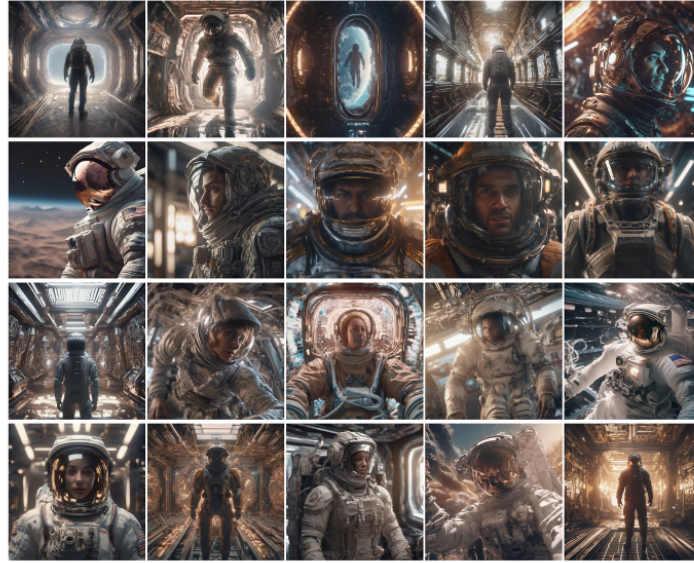

“photo of an astronaut”

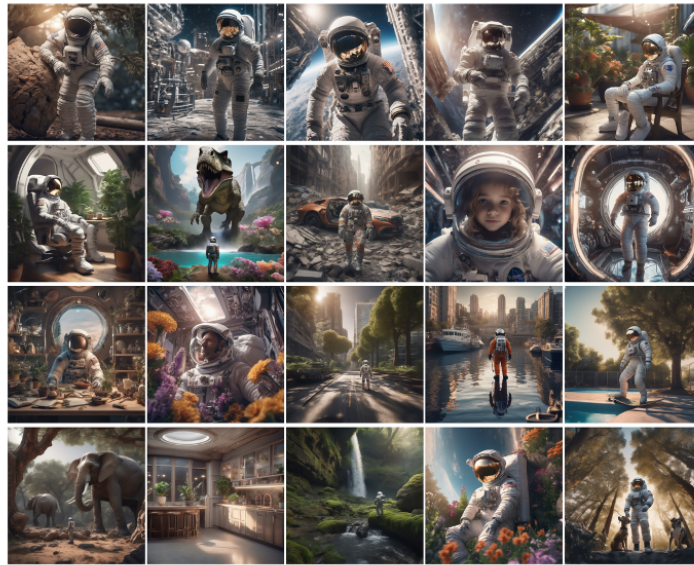

Ours

Figure 4: Additional baseline comparisons. Here, we randomly sample 20 samples per prompt and per setting and show all of them without cherry picking. The Baseline 2 is implemented by prompt engineering and negative prompt techniques. The query to Gemini is f“What would be the frequently co-occurring objects that can be likely placed in the scene generated by the given prompt ‘{prompt}’? Do not answer the words mentioned in the prompt. Answer 10 objects except for {important\_obj} one line with comma.”, where important\_obj is manually predefined as key object from the prompt (e.g., “ancient dragon” from “A fantasy illustration of ancient dragon”). The answer is used as a negative prompt during the sampling process.

216  
217  
218  
219  
220  
221  
222  
223  
224  
225  
226  
227  
228  
229  
230  
231  
232  
233  
234  
235  
236  
237  
238  
239  
240  
241  
242  
243  
244  
245  
246  
247  
248  
249  
250  
251  
252  
253  
254  
255  
256  
257  
258  
259  
260  
261  
262  
263  
264  
265  
266  
267  
268  
269

### Baseline 1: prompt engineering

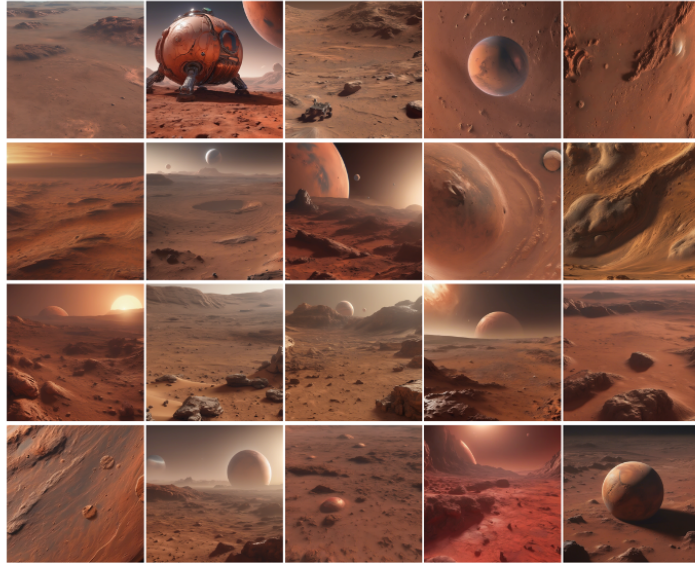

### “photo of Mars”

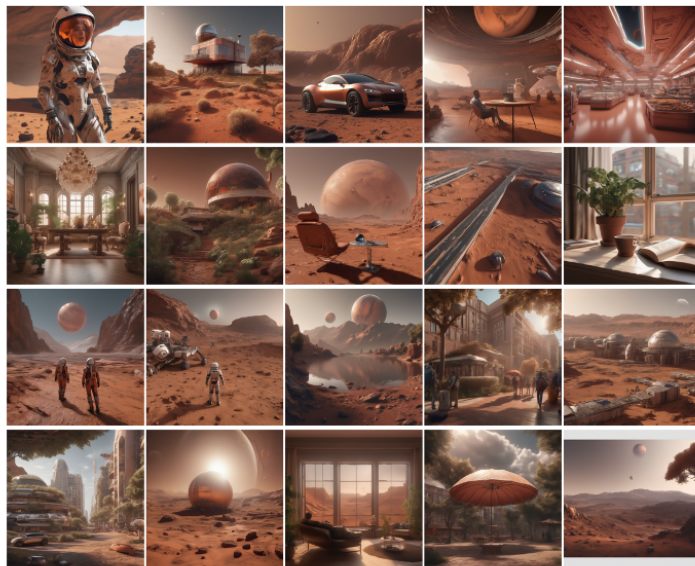

### Ours

Figure 5: Additional baseline comparisons. Here, we randomly sample 20 samples per prompt and per setting and show all of them without cherry picking. The Baseline 1 is implemented by a simple prompt engineering. The query to Gemini is f“briefly modify the given prompt to be creative. Answer in one sentence.: ‘{prompt}’ “. The engineered prompt is used as a text input.

270  
271  
272  
273  
274  
275  
276  
277  
278  
279  
280  
281  
282  
283  
284  
285  
286  
287  
288  
289  
290  
291  
292  
293  
294  
295  
296  
297  
298  
299  
300  
301  
302  
303  
304  
305  
306  
307  
308  
309  
310  
311  
312  
313  
314  
315  
316  
317  
318  
319  
320  
321  
322  
323

### Baseline 2: prompt engineering + negative prompt

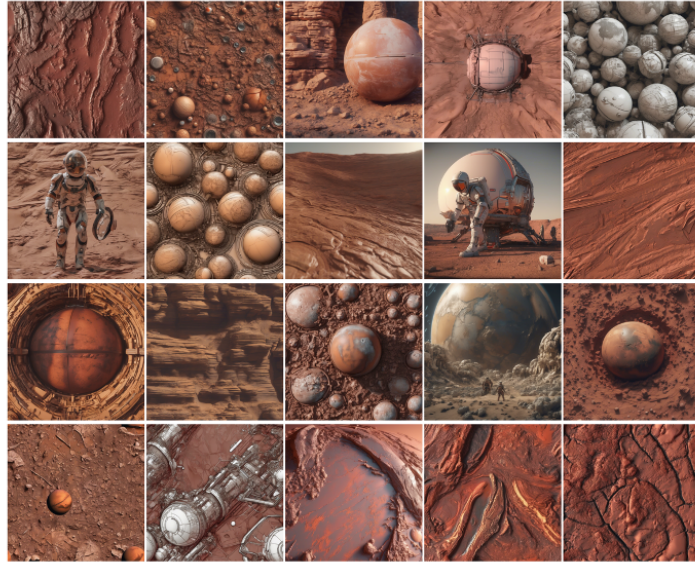

“photo of Mars”

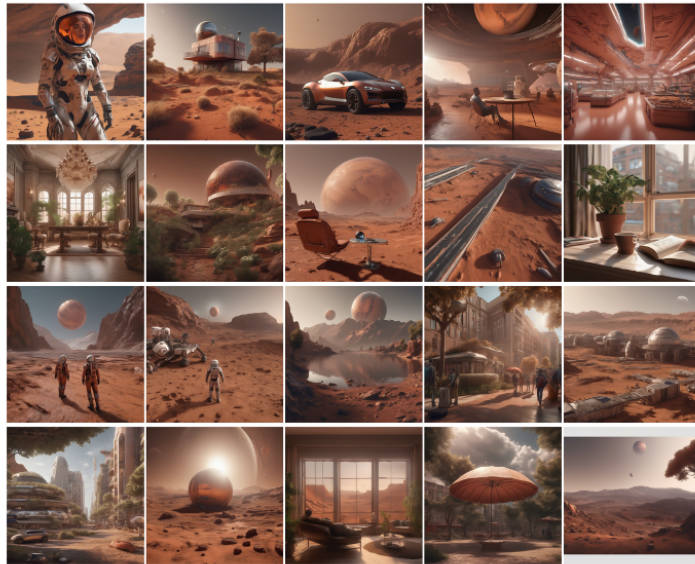

Ours

Figure 6: Additional baseline comparisons. Here, we randomly sample 20 samples per prompt and per setting and show all of them without cherry picking. The Baseline 2 is implemented by prompt engineering and negative prompt techniques. The query to Gemini is f“What would be the frequently co-occurring objects that can be likely placed in the scene generated by the given prompt ‘{prompt}’? Do not answer the words mentioned in the prompt. Answer 10 objects except for {important\_obj} one line with comma.”, where important\_obj is manually predefined as key object from the prompt. (e.g., “ancient dragon” from “A fantasy illustration of ancient dragon”.) The answer is used as a negative prompt during the sampling process.

324  
325  
326  
327  
328  
329  
330  
331  
332  
333  
334  
335  
336  
337  
338  
339  
340  
341  
342  
343  
344  
345  
346  
347  
348  
349  
350  
351  
352  
353  
354  
355  
356  
357  
358  
359  
360  
361  
362  
363  
364  
365  
366  
367  
368  
369  
370  
371  
372  
373  
374  
375  
376  
377

### Baseline 1: prompt engineering

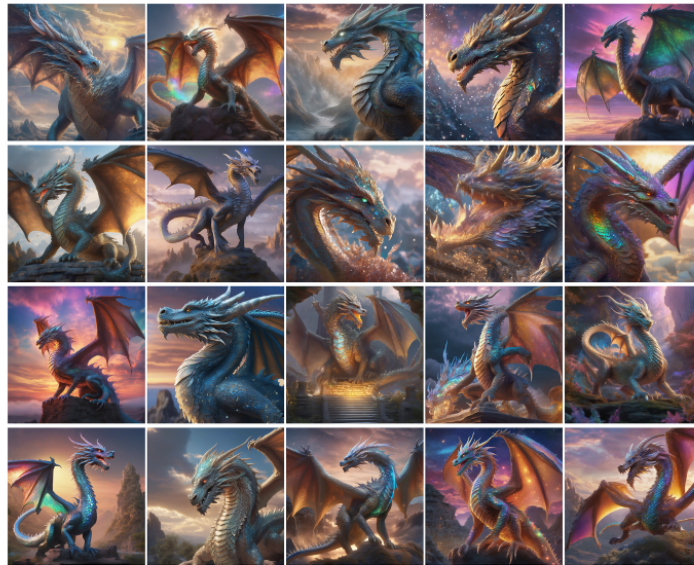

### “A fantasy illustration of ancient dragon”

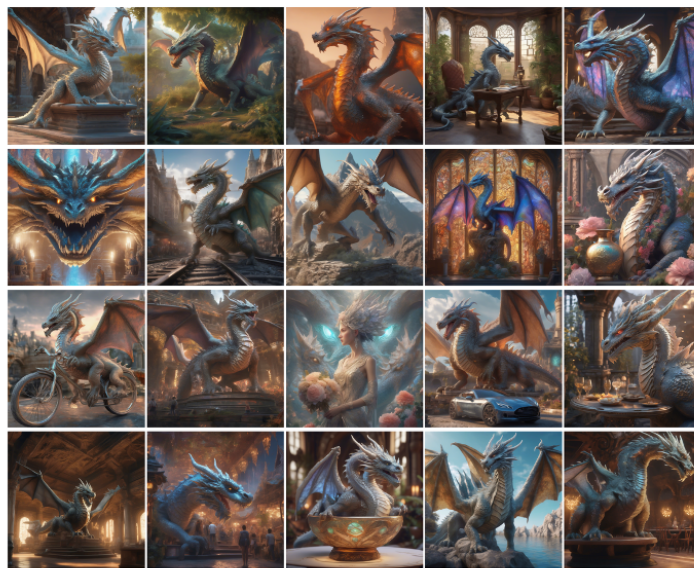

### Ours

Figure 7: Additional baseline comparisons. Here, we randomly sample 20 samples per prompt and per setting and show all of them without cherry picking. The Baseline 1 is implemented by a simple prompt engineering. The query to Gemini is f“briefly modify the given prompt to be creative. Answer in one sentence.: ‘{prompt}’ “. The engineered prompt is used as a text input.

378  
 379  
 380  
 381  
 382  
 383  
 384  
 385  
 386  
 387  
 388  
 389  
 390  
 391  
 392  
 393  
 394  
 395  
 396  
 397  
 398  
 399  
 400  
 401  
 402  
 403  
 404  
 405  
 406  
 407  
 408  
 409  
 410  
 411  
 412  
 413  
 414  
 415  
 416  
 417  
 418  
 419  
 420  
 421  
 422  
 423  
 424  
 425  
 426  
 427  
 428  
 429  
 430  
 431

### Baseline 2: prompt engineering + negative prompt

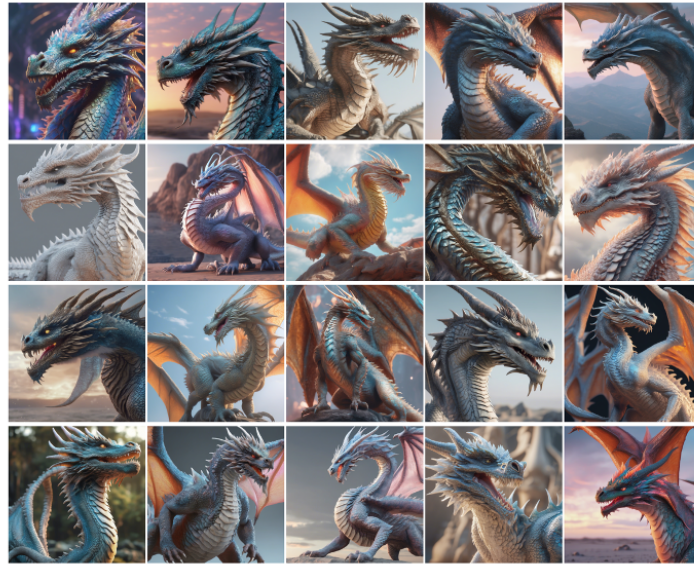

“A fantasy illustration of ancient dragon”

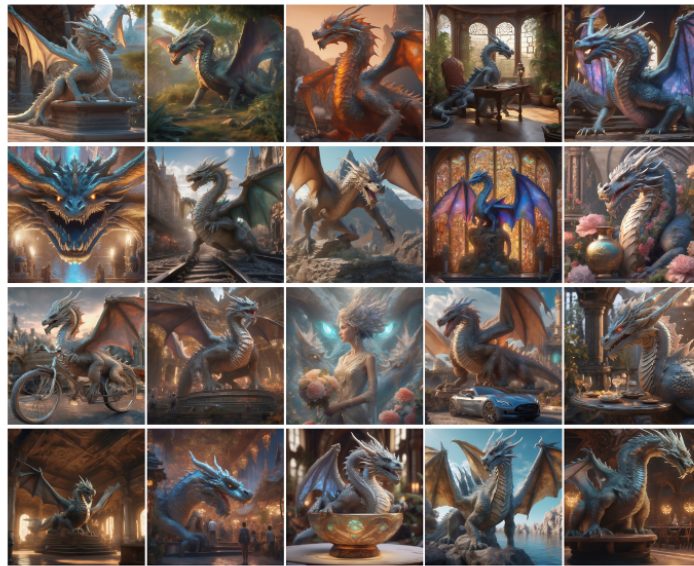

Ours

Figure 8: Additional baseline comparisons. Here, we randomly sample 20 samples per prompt and per setting and show all of them without cherry picking. The Baseline 2 is implemented by prompt engineering and negative prompt techniques. The query to Gemini is f“What would be the frequently co-occurring objects that can be likely placed in the scene generated by the given prompt ‘{prompt}’? Do not answer the words mentioned in the prompt. Answer 10 objects except for {important\_obj} one line with comma.”, where important\_obj is manually predefined as key object from the prompt. (e.g., “ancient dragon” from “A fantasy illustration of ancient dragon”). The answer is used as a negative prompt during the sampling process.



432  
433  
434  
435  
436  
437  
438  
439  
440  
441  
442  
443  
444  
445  
446  
447  
448  
449  
450  
451  
452  
453  
454  
455  
456  
457  
458  
459  
460  
461  
462  
463  
464  
465  
466  
467  
468  
469  
470  
471  
472  
473  
474  
475  
476  
477  
478  
479  
480  
481  
482  
483  
484  
485

### Baseline 1: prompt engineering

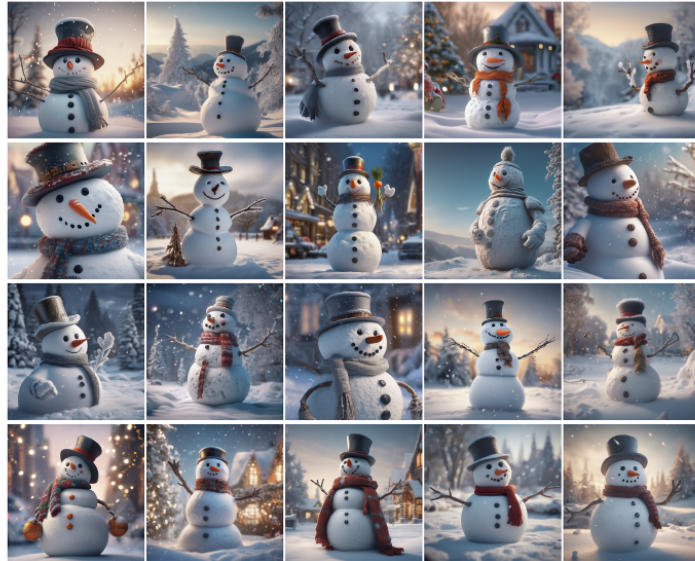

“photo of a snowman”

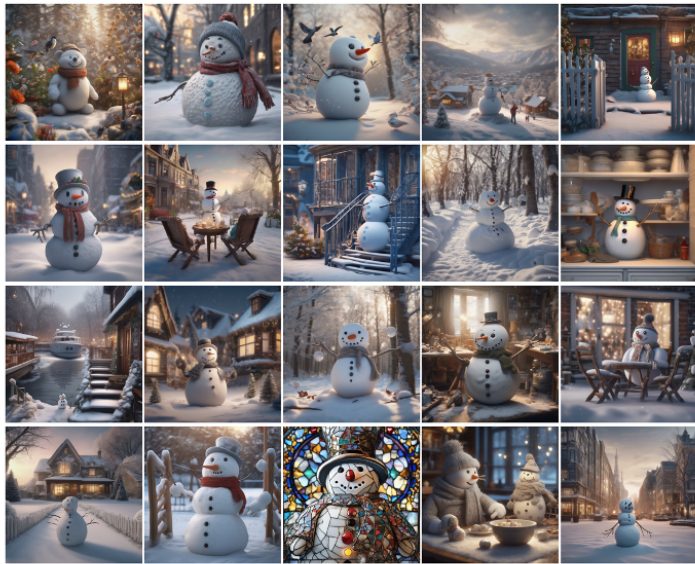

Ours

Figure 9: Additional baseline comparisons. Here, we randomly sample 20 samples per prompt and per setting and show all of them without cherry picking. The Baseline 1 is implemented by a simple prompt engineering. The query to Gemini is f“briefly modify the given prompt to be creative. Answer in one sentence.: ‘{prompt}’ “. The engineered prompt is used as a text input.

486  
487  
488  
489  
490  
491  
492  
493  
494  
495  
496  
497  
498  
499  
500  
501  
502  
503  
504  
505  
506  
507  
508  
509  
510  
511  
512  
513  
514  
515  
516  
517  
518  
519  
520  
521  
522  
523  
524  
525  
526  
527  
528  
529  
530  
531  
532  
533  
534  
535  
536  
537  
538  
539

### Baseline 2: prompt engineering + negative prompt

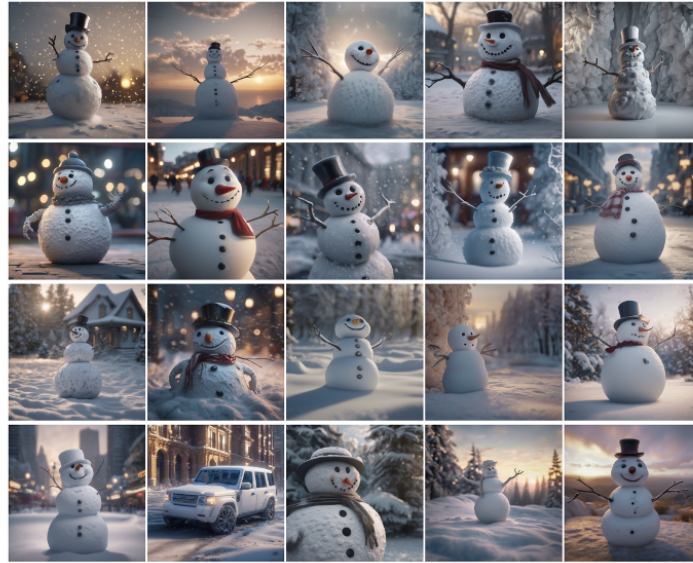

“photo of a snowman”

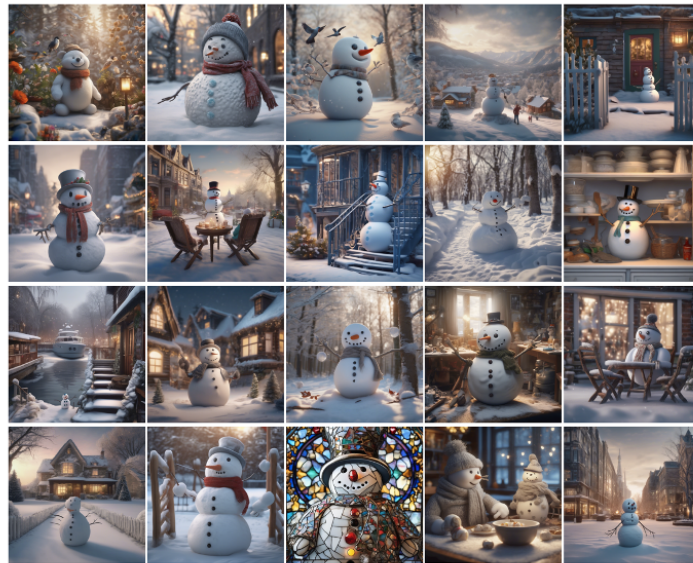

Ours

Figure 10: Additional baseline comparisons. Here, we randomly sample 20 samples per prompt and per setting and show all of them without cherry picking. The Baseline 2 is implemented by prompt engineering and negative prompt techniques. The query to Gemini is f“What would be the frequently co-occurring objects that can be likely placed in the scene generated by the given prompt ‘{prompt}’? Do not answer the words mentioned in the prompt. Answer 10 objects except for {important\_obj} one line with comma.”, where important\_obj is manually predefined as key object from the prompt. (e.g., “ancient dragon” from “A fantasy illustration of ancient dragon”.) The answer is used as a negative prompt during the sampling process.

540  
541  
542  
543  
544  
545  
546  
547  
548  
549  
550  
551  
552  
553  
554  
555  
556  
557  
558  
559  
560  
561  
562  
563  
564  
565  
566  
567  
568  
569  
570  
571  
572  
573  
574  
575  
576  
577  
578  
579  
580  
581  
582  
583  
584  
585  
586  
587  
588  
589  
590  
591  
592  
593

### Baseline 1: prompt engineering

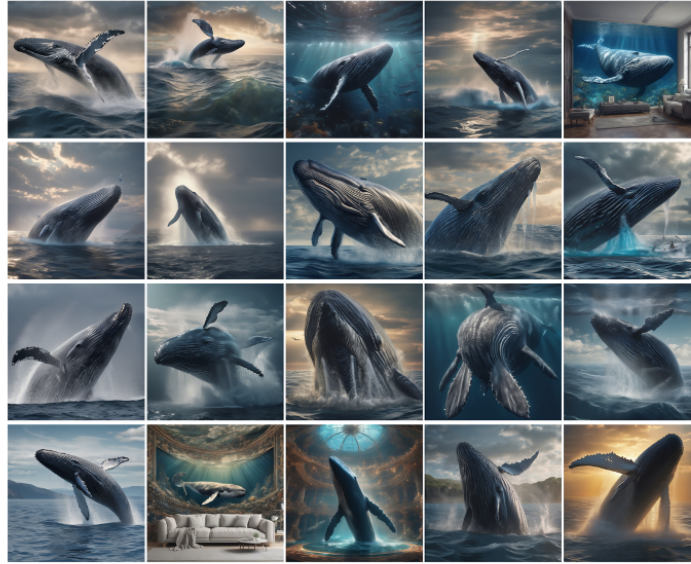

“photo of a whale”

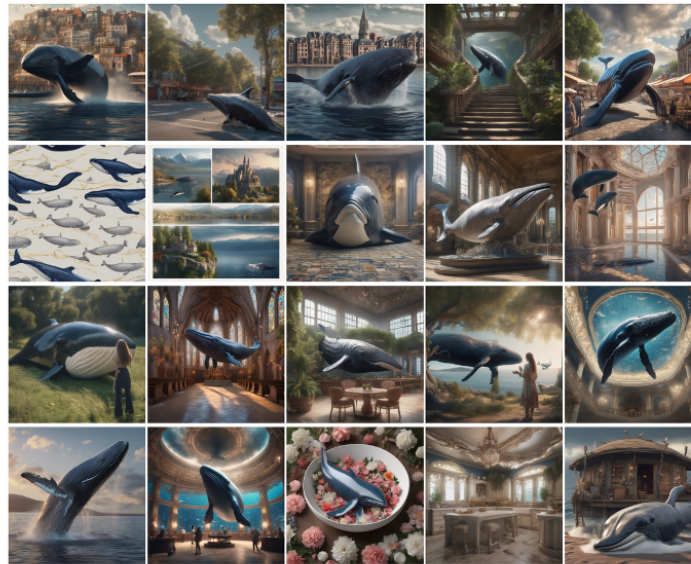

Ours

Figure 11: Additional baseline comparisons. Here, we randomly sample 20 samples per prompt and per setting and show all of them without cherry picking. The Baseline 1 is implemented by a simple prompt engineering. The query to Gemini is f“briefly modify the given prompt to be creative. Answer in one sentence.: ‘{prompt}’ “. The engineered prompt is used as a text input.

594  
595  
596  
597  
598  
599  
600  
601  
602  
603  
604  
605  
606  
607  
608  
609  
610  
611  
612  
613  
614  
615  
616  
617  
618  
619  
620  
621  
622  
623  
624  
625  
626  
627  
628  
629  
630  
631  
632  
633  
634  
635  
636  
637  
638  
639  
640  
641  
642  
643  
644  
645  
646  
647

### Baseline 2: prompt engineering + negative prompt

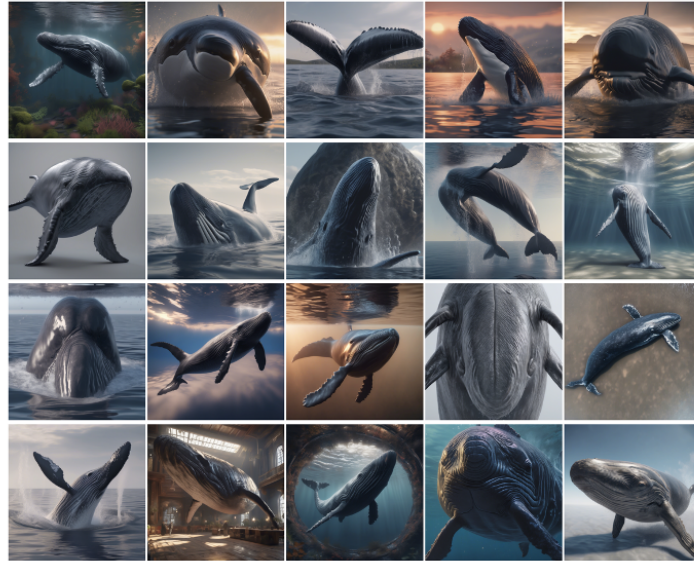

“photo of a whale”

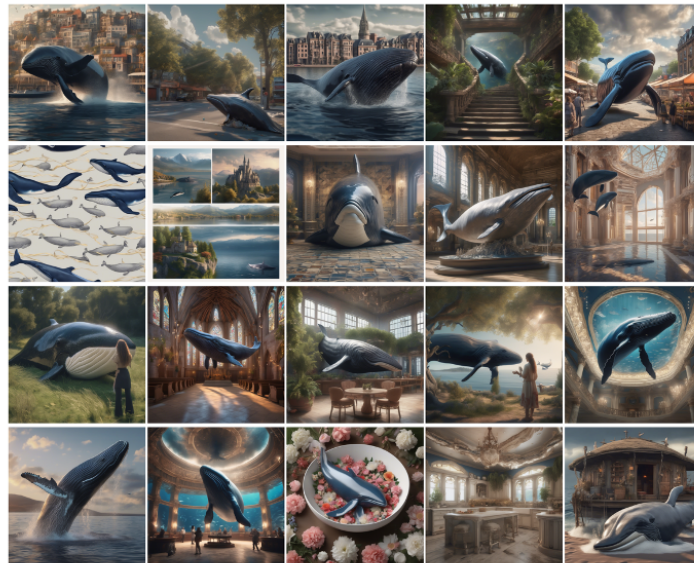

Ours

Figure 12: Additional baseline comparisons. Here, we randomly sample 20 samples per prompt and per setting and show all of them without cherry picking. The Baseline 2 is implemented by prompt engineering and negative prompt techniques. The query to Gemini is f“What would be the frequently co-occurring objects that can be likely placed in the scene generated by the given prompt ‘{prompt}’? Do not answer the words mentioned in the prompt. Answer 10 objects except for {important\_obj} one line with comma.”, where important\_obj is manually predefined as key object from the prompt. (e.g., “ancient dragon” from “A fantasy illustration of ancient dragon”.) The answer is used as a negative prompt during the sampling process.

648  
649  
650  
651  
652  
653  
654  
655  
656  
657  
658  
659  
660  
661  
662  
663  
664  
665  
666  
667  
668  
669  
670  
671  
672  
673  
674  
675  
676  
677  
678  
679  
680  
681  
682  
683  
684  
685  
686  
687  
688  
689  
690  
691  
692  
693  
694  
695  
696  
697  
698  
699  
700  
701

### Baseline 1: prompt engineering

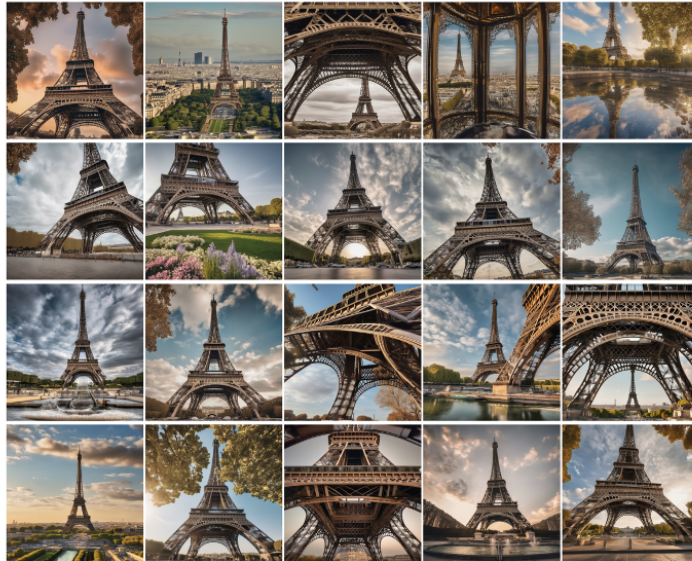

“A stock photo of the Eiffel Tower, Paris”

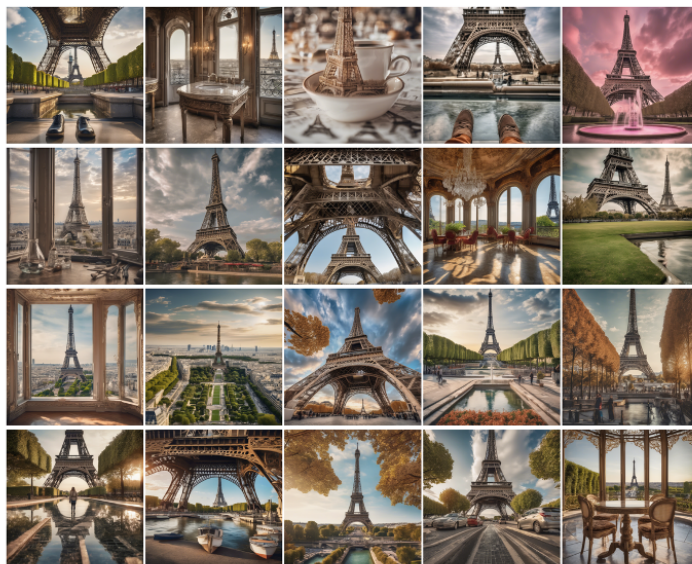

Ours

Figure 13: Additional baseline comparisons. Here, we randomly sample 20 samples per prompt and per setting and show all of them without cherry picking. The Baseline 1 is implemented by a simple prompt engineering. The query to Gemini is f“briefly modify the given prompt to be creative. Answer in one sentence.: ‘{prompt}’ “. The engineered prompt is used as a text input.

702  
703  
704  
705  
706  
707  
708  
709  
710  
711  
712  
713  
714  
715  
716  
717  
718  
719  
720  
721  
722  
723  
724  
725  
726  
727  
728  
729  
730  
731  
732  
733  
734  
735  
736  
737  
738  
739  
740  
741  
742  
743  
744  
745  
746  
747  
748  
749  
750  
751  
752  
753  
754  
755

### Baseline 2: prompt engineering + negative prompt

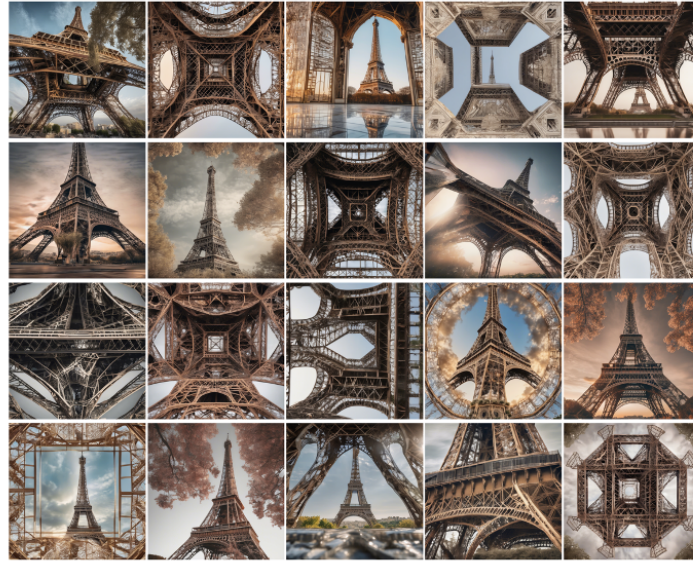

“A stock photo of the Eiffel Tower, Paris”

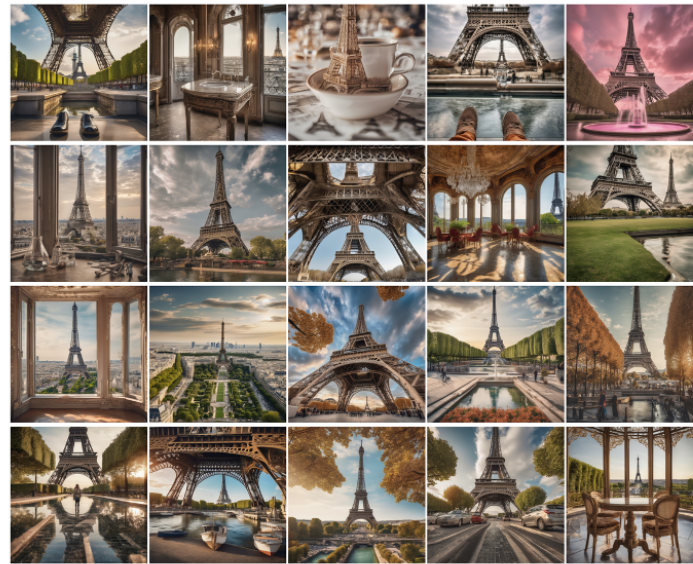

Ours

Figure 14: Additional baseline comparisons. Here, we randomly sample 20 samples per prompt and per setting and show all of them without cherry picking. The Baseline 2 is implemented by prompt engineering and negative prompt techniques. The query to Gemini is f“What would be the frequently co-occurring objects that can be likely placed in the scene generated by the given prompt ‘{prompt}’? Do not answer the words mentioned in the prompt. Answer 10 objects except for {important\_obj} one line with comma.”, where important\_obj is manually predefined as key object from the prompt. (e.g., “ancient dragon” from “A fantasy illustration of ancient dragon”.) The answer is used as a negative prompt during the sampling process.

756  
757  
758  
759  
760  
761  
762  
763  
764  
765  
766  
767  
768  
769  
770  
771  
772  
773  
774  
775  
776  
777  
778  
779  
780  
781  
782  
783  
784  
785  
786  
787  
788  
789  
790  
791  
792  
793  
794  
795  
796  
797  
798  
799  
800  
801  
802  
803  
804  
805  
806  
807  
808  
809

### Baseline 1: prompt engineering

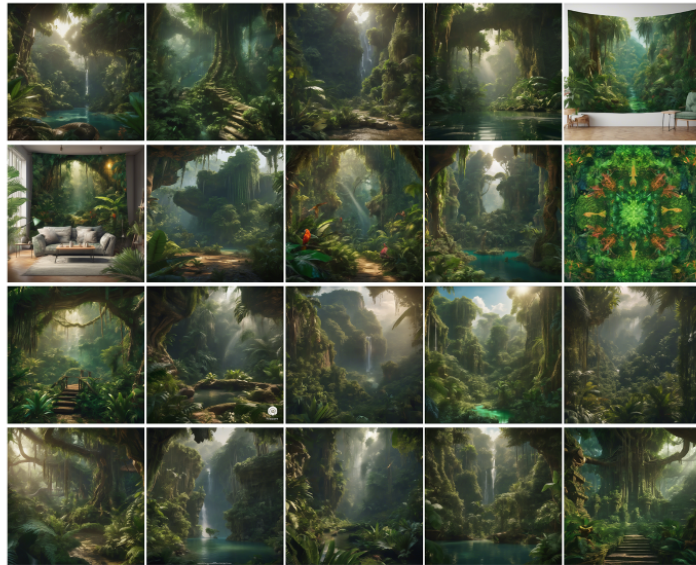

“photo of jungle”

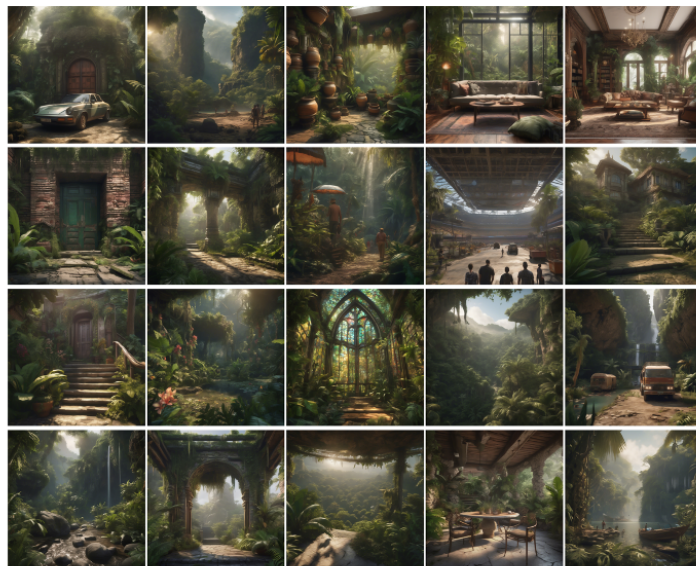

Ours

Figure 15: Additional baseline comparisons. Here, we randomly sample 20 samples per prompt and per setting and show all of them without cherry picking. The Baseline 1 is implemented by a simple prompt engineering. The query to Gemini is f“briefly modify the given prompt to be creative. Answer in one sentence.: ‘{prompt}’ “. The engineered prompt is used as a text input.

810  
811  
812  
813  
814  
815  
816  
817  
818  
819  
820  
821  
822  
823  
824  
825  
826  
827  
828  
829  
830  
831  
832  
833  
834  
835  
836  
837  
838  
839  
840  
841  
842  
843  
844  
845  
846  
847  
848  
849  
850  
851  
852  
853  
854  
855  
856  
857  
858  
859  
860  
861  
862  
863

### Baseline 2: prompt engineering + negative prompt

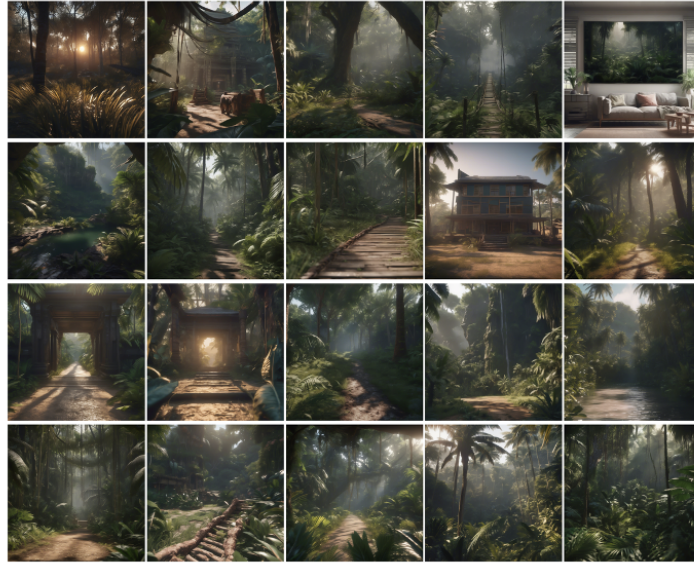

“photo of jungle”

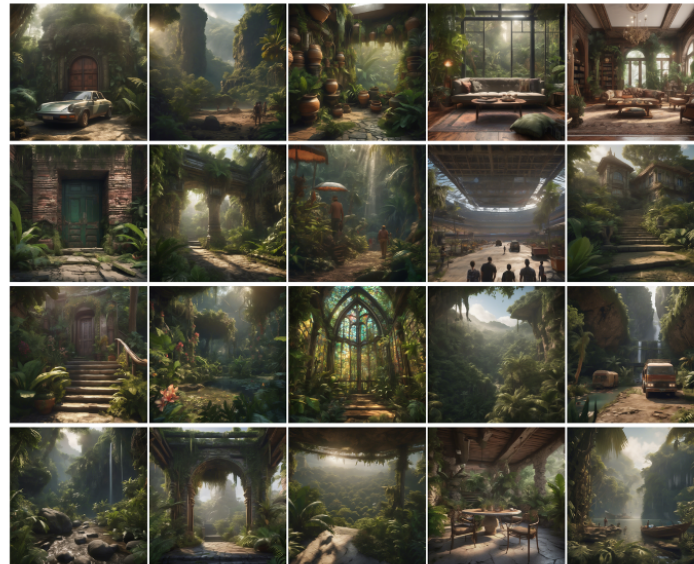

Ours

Figure 16: Additional baseline comparisons. Here, we randomly sample 20 samples per prompt and per setting and show all of them without cherry picking. The Baseline 2 is implemented by prompt engineering and negative prompt techniques. The query to Gemini is f“What would be the frequently co-occurring objects that can be likely placed in the scene generated by the given prompt ‘{prompt}’? Do not answer the words mentioned in the prompt. Answer 10 objects except for {important\_obj} one line with comma.”, where important\_obj is manually predefined as key object from the prompt. (e.g., “ancient dragon” from “A fantasy illustration of ancient dragon”.) The answer is used as a negative prompt during the sampling process.



864  
865  
866  
867  
868  
869  
870  
871  
872  
873  
874  
875  
876  
877  
878  
879  
880  
881  
882  
883  
884  
885  
886  
887  
888  
889  
890  
891  
892  
893  
894  
895  
896  
897  
898  
899  
900  
901  
902  
903  
904  
905  
906  
907  
908  
909  
910  
911  
912  
913  
914  
915  
916  
917

### Baseline 1: prompt engineering

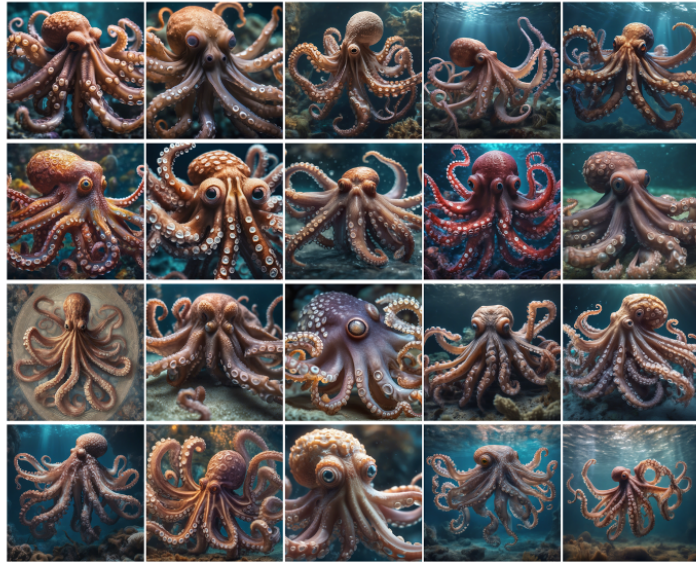

“photo of an octopus”

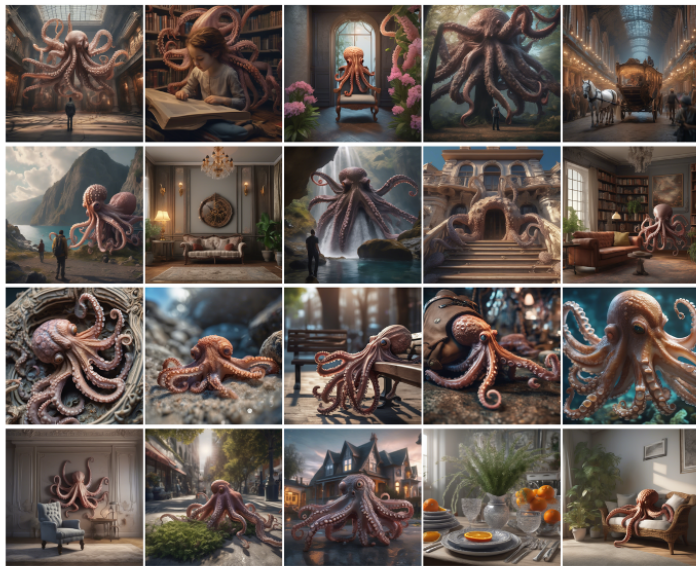

Ours

Figure 17: Additional baseline comparisons. Here, we randomly sample 20 samples per prompt and per setting and show all of them without cherry picking. The Baseline 1 is implemented by a simple prompt engineering. The query to Gemini is f“briefly modify the given prompt to be creative. Answer in one sentence.: ‘{prompt}’ “. The engineered prompt is used as a text input.

918  
919  
920  
921  
922  
923  
924  
925  
926  
927  
928  
929  
930  
931  
932  
933  
934  
935  
936  
937  
938  
939  
940  
941  
942  
943  
944  
945  
946  
947  
948  
949  
950  
951  
952  
953  
954  
955  
956  
957  
958  
959  
960  
961  
962  
963  
964  
965  
966  
967  
968  
969  
970  
971

### Baseline 2: prompt engineering + negative prompt

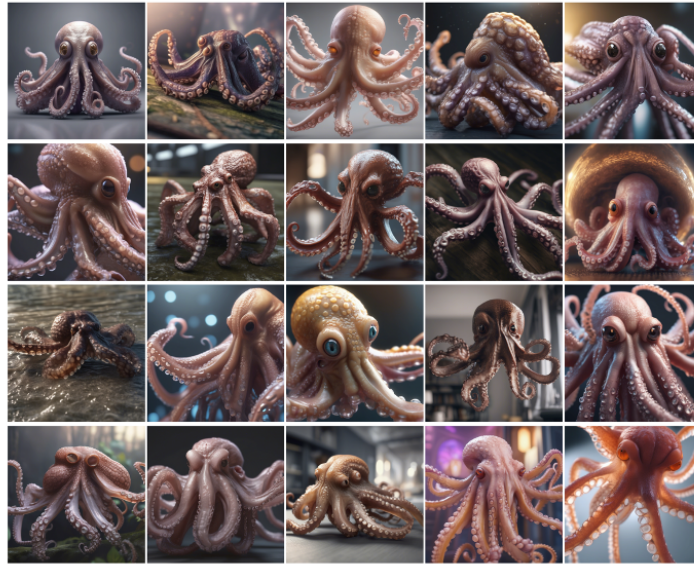

“photo of an octopus”

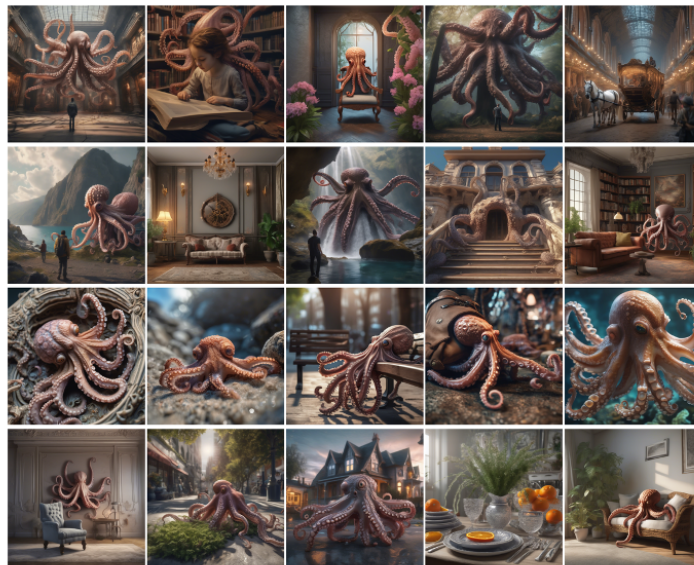

Ours

Figure 18: Additional baseline comparisons. Here, we randomly sample 20 samples per prompt and per setting and show all of them without cherry picking. The Baseline 2 is implemented by prompt engineering and negative prompt techniques. The query to Gemini is f“What would be the frequently co-occurring objects that can be likely placed in the scene generated by the given prompt ‘{prompt}’? Do not answer the words mentioned in the prompt. Answer 10 objects except for {important\_obj} one line with comma.”, where important\_obj is manually predefined as key object from the prompt. (e.g., “ancient dragon” from “A fantasy illustration of ancient dragon”.) The answer is used as a negative prompt during the sampling process.

972  
973  
974  
975  
976  
977  
978  
979  
980  
981  
982  
983  
984  
985  
986  
987  
988  
989  
990  
991  
992  
993  
994  
995  
996  
997  
998  
999  
1000  
1001  
1002  
1003  
1004  
1005  
1006  
1007  
1008  
1009  
1010  
1011  
1012  
1013  
1014  
1015  
1016  
1017  
1018  
1019  
1020  
1021  
1022  
1023  
1024  
1025

### Baseline 1: prompt engineering

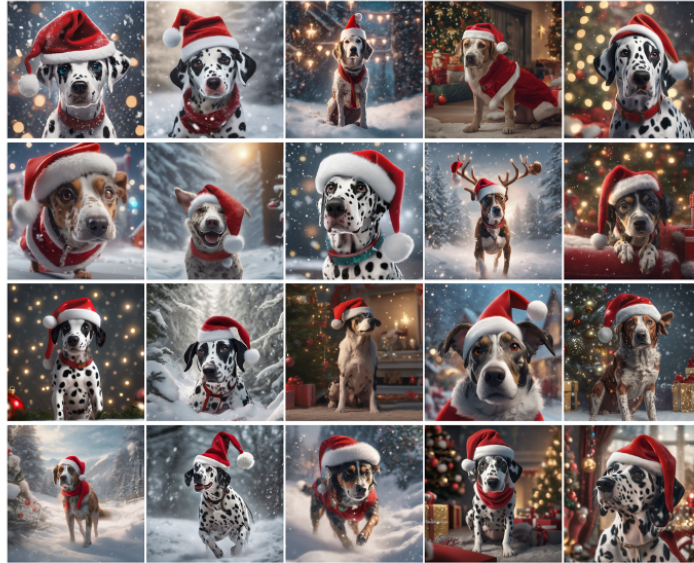

“A spotted dog wearing a Santa Claus hat”

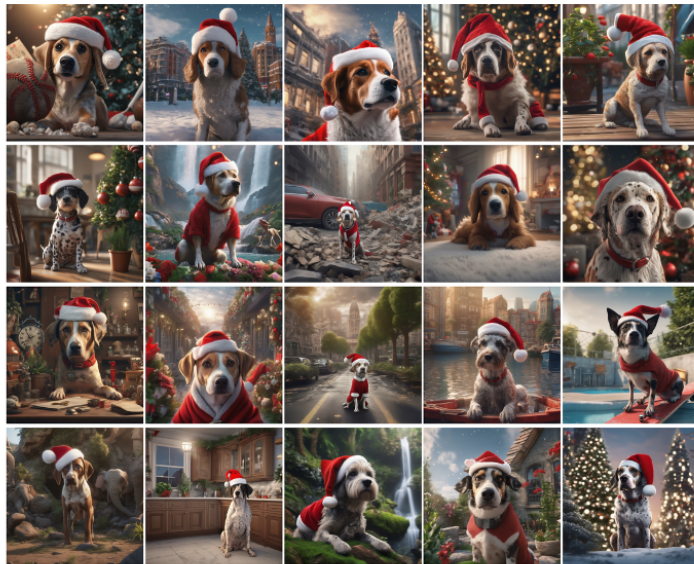

### Ours

Figure 19: Additional baseline comparisons. Here, we randomly sample 20 samples per prompt and per setting and show all of them without cherry picking. The Baseline 1 is implemented by a simple prompt engineering. The query to Gemini is f“briefly modify the given prompt to be creative. Answer in one sentence.: ‘{prompt}’ “. The engineered prompt is used as a text input.

1026  
 1027  
 1028  
 1029  
 1030  
 1031  
 1032  
 1033  
 1034  
 1035  
 1036  
 1037  
 1038  
 1039  
 1040  
 1041  
 1042  
 1043  
 1044  
 1045  
 1046  
 1047  
 1048  
 1049  
 1050  
 1051  
 1052  
 1053  
 1054  
 1055  
 1056  
 1057  
 1058  
 1059  
 1060  
 1061  
 1062  
 1063  
 1064  
 1065  
 1066  
 1067  
 1068  
 1069  
 1070  
 1071  
 1072  
 1073  
 1074  
 1075  
 1076  
 1077  
 1078  
 1079

Baseline 2: prompt engineering + negative prompt

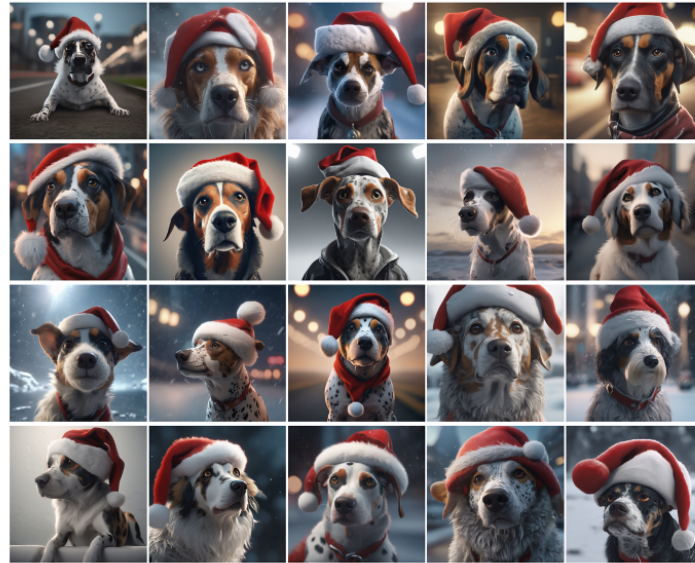

“A spotted dog wearing a Santa Claus hat”

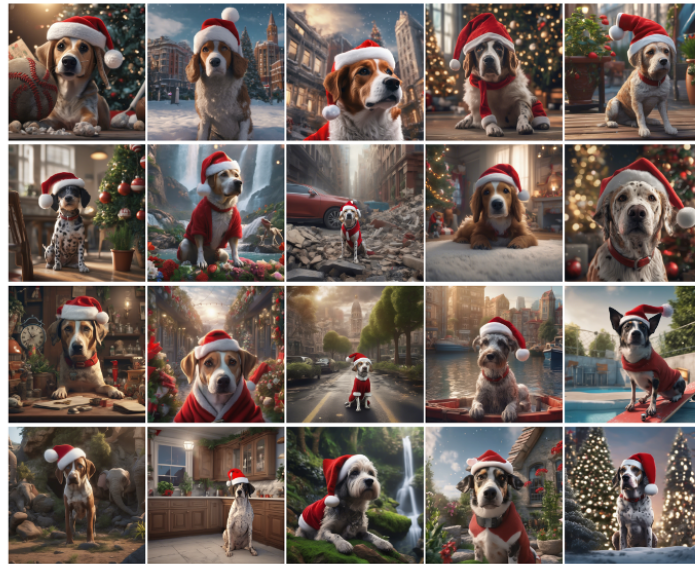

Ours

Figure 20: Additional baseline comparisons. Here, we randomly sample 20 samples per prompt and per setting and show all of them without cherry picking. The Baseline 2 is implemented by prompt engineering and negative prompt techniques. The query to Gemini is f“What would be the frequently co-occurring objects that can be likely placed in the scene generated by the given prompt ‘{prompt}’? Do not answer the words mentioned in the prompt. Answer 10 objects except for {important\_obj} one line with comma.”, where important\_obj is manually predefined as key object from the prompt. (e.g., “ancient dragon” from “A fantasy illustration of ancient dragon”.) The answer is used as a negative prompt during the sampling process.

1080  
1081  
1082  
1083  
1084  
1085  
1086  
1087  
1088  
1089  
1090  
1091  
1092  
1093  
1094  
1095  
1096  
1097  
1098  
1099  
1100  
1101  
1102  
1103  
1104  
1105  
1106  
1107  
1108  
1109  
1110  
1111  
1112  
1113  
1114  
1115  
1116  
1117  
1118  
1119  
1120  
1121  
1122  
1123  
1124  
1125  
1126  
1127  
1128  
1129  
1130  
1131  
1132  
1133

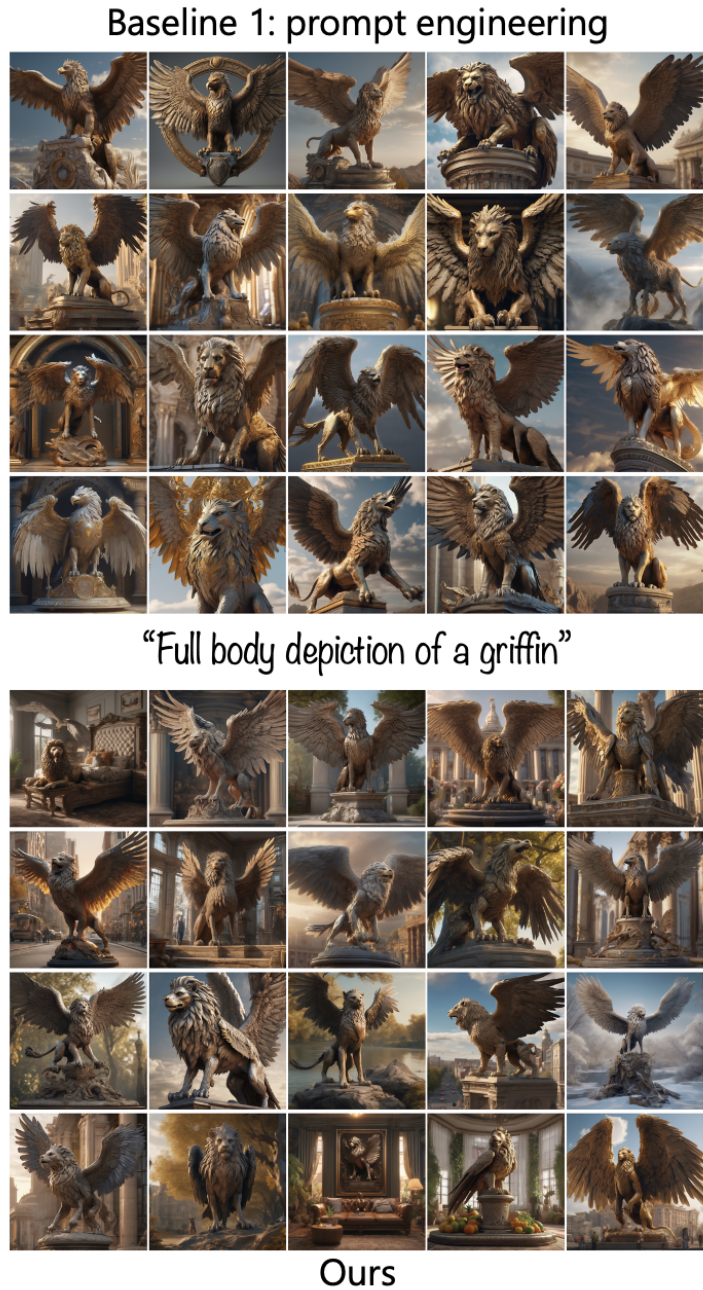

Figure 21: Additional baseline comparisons. Here, we randomly sample 20 samples per prompt and per setting and show all of them without cherry picking. The Baseline 1 is implemented by a simple prompt engineering. The query to Gemini is f“briefly modify the given prompt to be creative. Answer in one sentence.: ‘{prompt}’ “. The engineered prompt is used as a text input.

1134  
 1135  
 1136  
 1137  
 1138  
 1139  
 1140  
 1141  
 1142  
 1143  
 1144  
 1145  
 1146  
 1147  
 1148  
 1149  
 1150  
 1151  
 1152  
 1153  
 1154  
 1155  
 1156  
 1157  
 1158  
 1159  
 1160  
 1161  
 1162  
 1163  
 1164  
 1165  
 1166  
 1167  
 1168  
 1169  
 1170  
 1171  
 1172  
 1173  
 1174  
 1175  
 1176  
 1177  
 1178  
 1179  
 1180  
 1181  
 1182  
 1183  
 1184  
 1185  
 1186  
 1187

### Baseline 2: prompt engineering + negative prompt

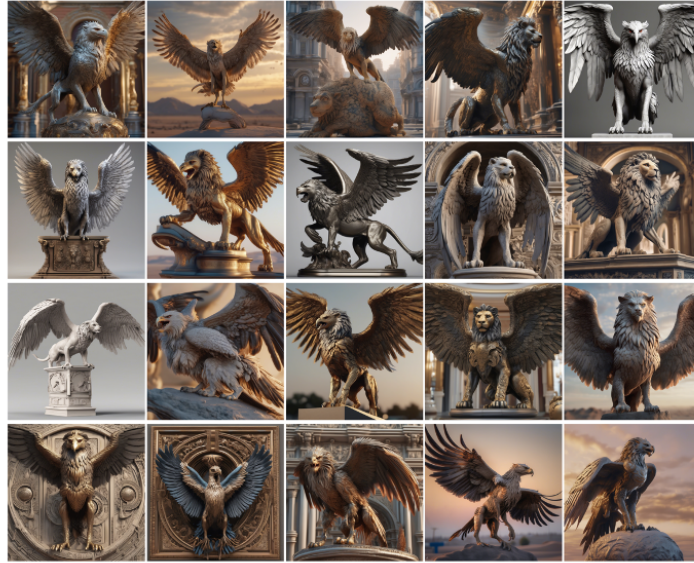

“Full body depiction of a griffin”

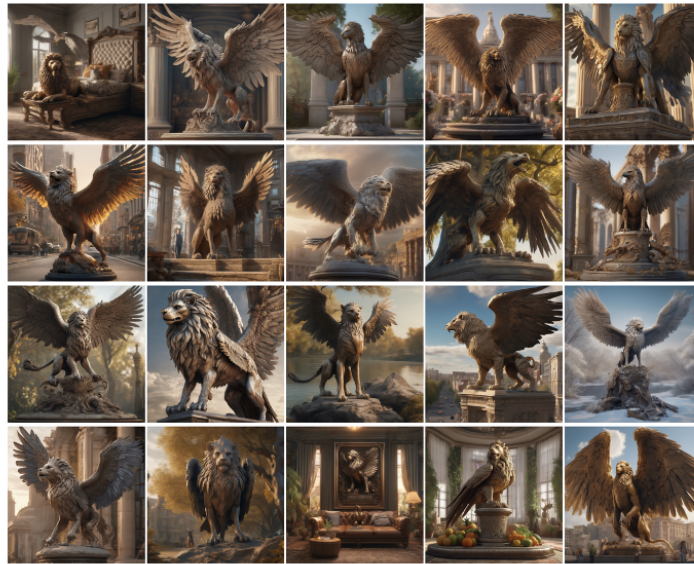

Ours

Figure 22: Additional baseline comparisons. Here, we randomly sample 20 samples per prompt and per setting and show all of them without cherry picking. The Baseline 2 is implemented by prompt engineering and negative prompt techniques. The query to Gemini is f“What would be the frequently co-occurring objects that can be likely placed in the scene generated by the given prompt ‘{prompt}’? Do not answer the words mentioned in the prompt. Answer 10 objects except for {important\_obj} one line with comma.”, where important\_obj is manually predefined as key object from the prompt. (e.g., “ancient dragon” from “A fantasy illustration of ancient dragon”.) The answer is used as a negative prompt during the sampling process.

1188  
1189  
1190  
1191  
1192  
1193  
1194  
1195  
1196  
1197  
1198  
1199  
1200  
1201  
1202  
1203  
1204  
1205  
1206  
1207  
1208  
1209  
1210  
1211  
1212  
1213  
1214  
1215  
1216  
1217  
1218  
1219  
1220  
1221  
1222  
1223  
1224  
1225  
1226  
1227  
1228  
1229  
1230  
1231  
1232  
1233  
1234  
1235  
1236  
1237  
1238  
1239  
1240  
1241

### Baseline 1: prompt engineering

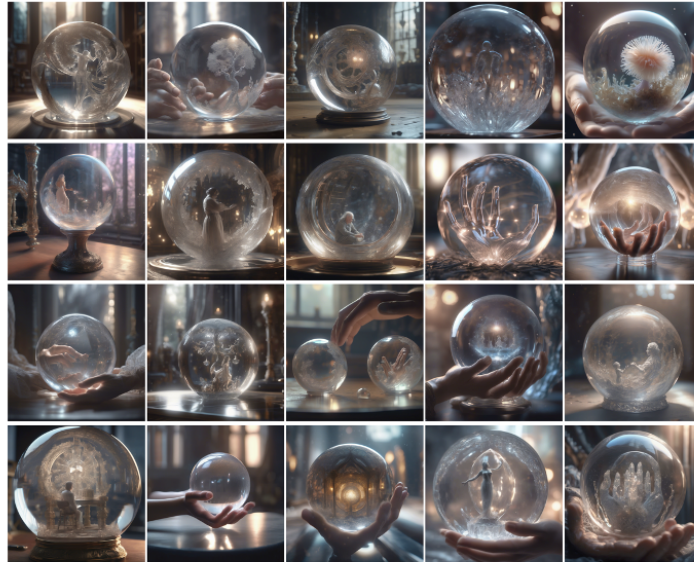

“A pair of hands through transparent glass ball”

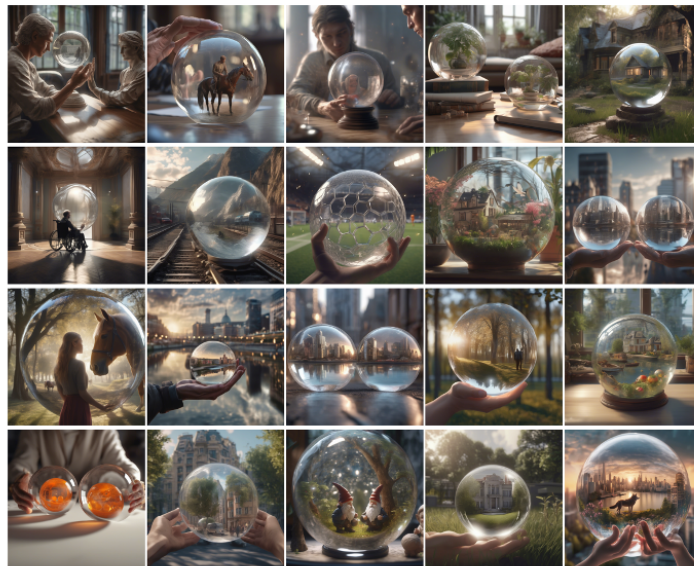

Ours

Figure 23: Additional baseline comparisons. Here, we randomly sample 20 samples per prompt and per setting and show all of them without cherry picking. The Baseline 1 is implemented by a simple prompt engineering. The query to Gemini is f“briefly modify the given prompt to be creative. Answer in one sentence.: ‘{prompt}’ “. The engineered prompt is used as a text input.

1242  
 1243  
 1244  
 1245  
 1246  
 1247  
 1248  
 1249  
 1250  
 1251  
 1252  
 1253  
 1254  
 1255  
 1256  
 1257  
 1258  
 1259  
 1260  
 1261  
 1262  
 1263  
 1264  
 1265  
 1266  
 1267  
 1268  
 1269  
 1270  
 1271  
 1272  
 1273  
 1274  
 1275  
 1276  
 1277  
 1278  
 1279  
 1280  
 1281  
 1282  
 1283  
 1284  
 1285  
 1286  
 1287  
 1288  
 1289  
 1290  
 1291  
 1292  
 1293  
 1294  
 1295

Baseline 2: prompt engineering + negative prompt

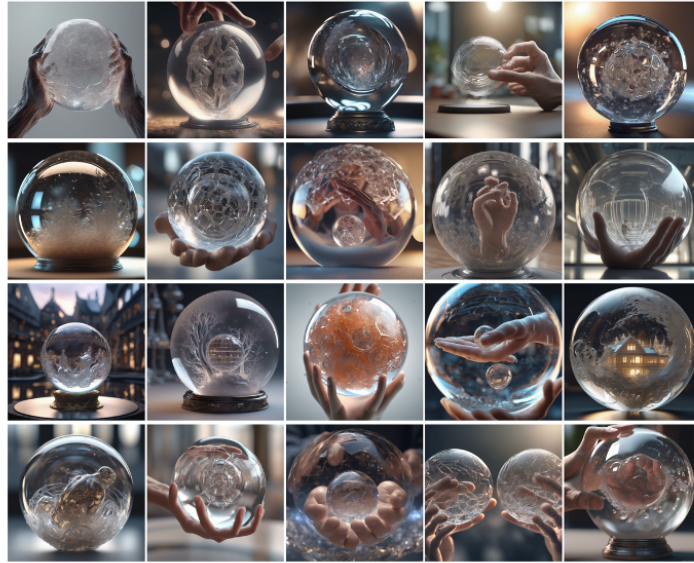

“A pair of hands through transparent glass ball”

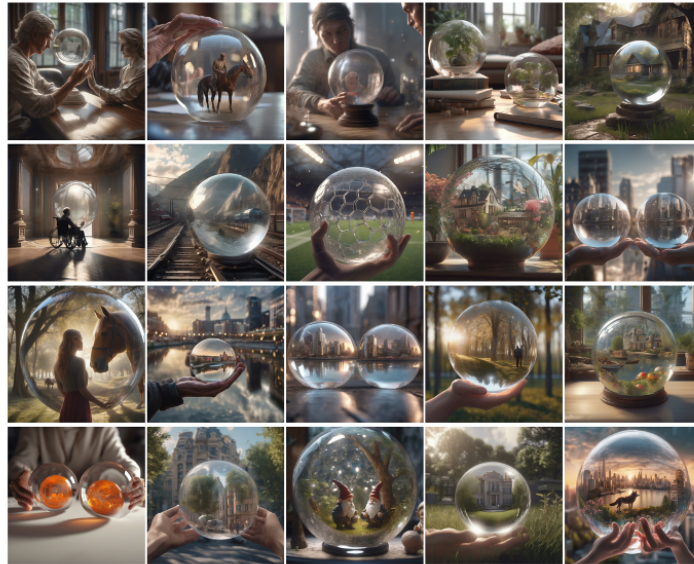

Ours

Figure 24: Additional baseline comparisons. Here, we randomly sample 20 samples per prompt and per setting and show all of them without cherry picking. The Baseline 2 is implemented by prompt engineering and negative prompt techniques. The query to Gemini is f“What would be the frequently co-occurring objects that can be likely placed in the scene generated by the given prompt ‘{prompt}’? Do not answer the words mentioned in the prompt. Answer 10 objects except for {important\_obj} one line with comma.”, where important\_obj is manually predefined as key object from the prompt. (e.g., “ancient dragon” from “A fantasy illustration of ancient dragon”.) The answer is used as a negative prompt during the sampling process.



1296  
1297  
1298  
1299  
1300  
1301  
1302  
1303  
1304  
1305  
1306  
1307  
1308  
1309  
1310  
1311  
1312  
1313  
1314  
1315  
1316  
1317  
1318  
1319  
1320  
1321  
1322  
1323  
1324  
1325  
1326  
1327  
1328  
1329  
1330  
1331  
1332  
1333  
1334  
1335  
1336  
1337  
1338  
1339  
1340  
1341  
1342  
1343  
1344  
1345  
1346  
1347  
1348  
1349

### Baseline 1: prompt engineering

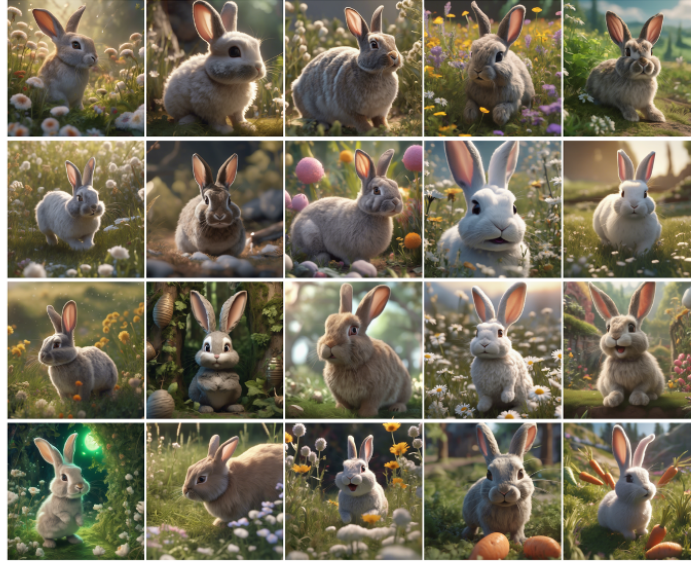

“A cute rabbit”

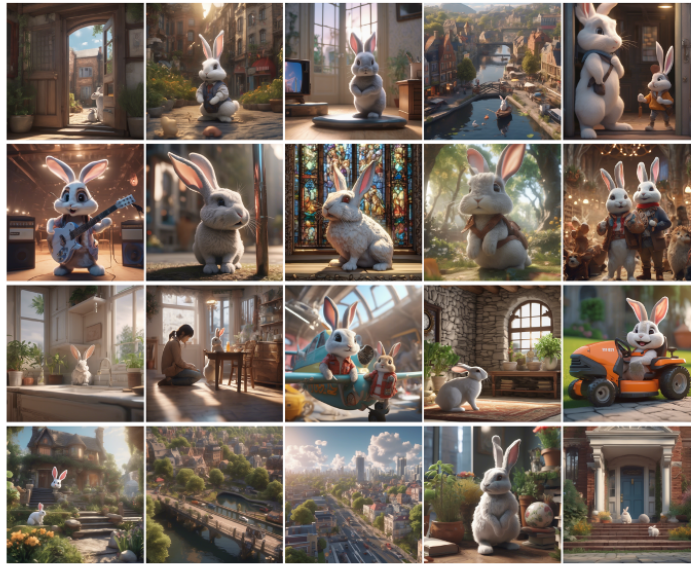

Ours

Figure 25: Additional baseline comparisons. Here, we randomly sample 20 samples per prompt and per setting and show all of them without cherry picking. The Baseline 1 is implemented by a simple prompt engineering. The query to Gemini is f“briefly modify the given prompt to be creative. Answer in one sentence.: ‘{prompt}’ “. The engineered prompt is used as a text input.

1350  
 1351  
 1352  
 1353  
 1354  
 1355  
 1356  
 1357  
 1358  
 1359  
 1360  
 1361  
 1362  
 1363  
 1364  
 1365  
 1366  
 1367  
 1368  
 1369  
 1370  
 1371  
 1372  
 1373  
 1374  
 1375  
 1376  
 1377  
 1378  
 1379  
 1380  
 1381  
 1382  
 1383  
 1384  
 1385  
 1386  
 1387  
 1388  
 1389  
 1390  
 1391  
 1392  
 1393  
 1394  
 1395  
 1396  
 1397  
 1398  
 1399  
 1400  
 1401  
 1402  
 1403

### Baseline 2: prompt engineering + negative prompt

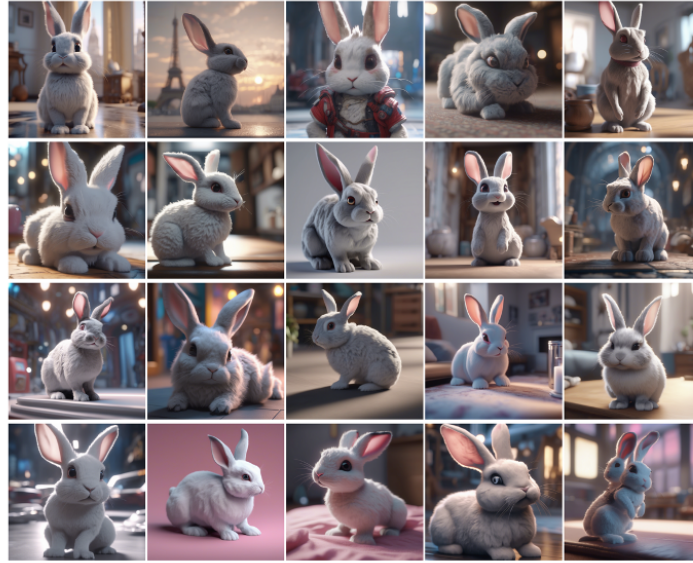

“A cute rabbit”

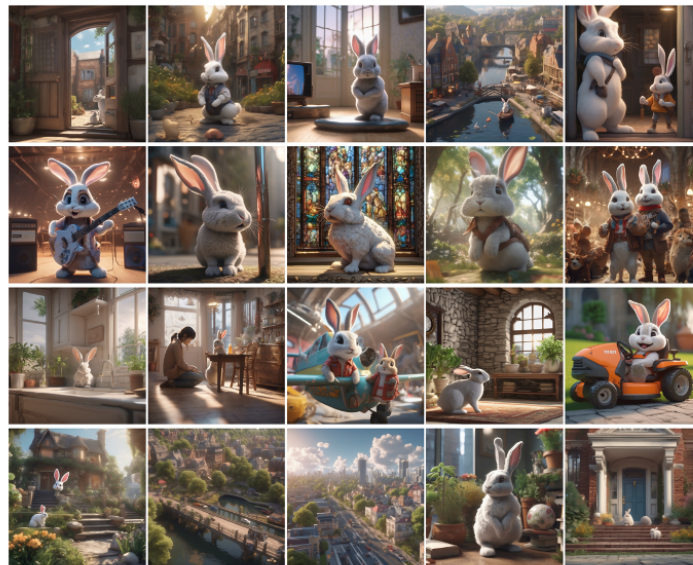

Ours

Figure 26: Additional baseline comparisons. Here, we randomly sample 20 samples per prompt and per setting and show all of them without cherry picking. The Baseline 2 is implemented by prompt engineering and negative prompt techniques. The query to Gemini is f“What would be the frequently co-occurring objects that can be likely placed in the scene generated by the given prompt ‘{prompt}’? Do not answer the words mentioned in the prompt. Answer 10 objects except for {important\_obj} one line with comma.”, where important\_obj is manually predefined as key object from the prompt. (e.g., “ancient dragon” from “A fantasy illustration of ancient dragon”.) The answer is used as a negative prompt during the sampling process.
